# Supplementary material for: Synthesis and structural studies of an electron deficient hexatitanium cluster dication stabilized by novel tritin anions
Source: Royal Society of Chemistry journal article supplement (doi:10.1039/c0dt01353f), 2011-01-01
Supplement: c0dt01353f.pdf [file c0dt01353f.pdf]

## Experimental Section

All manipulations unless stated otherwise, were carried out under a dry dinitrogen atmosphere using standard Schlenk technique.

### Synthesis of compounds

$\text{Cp}_2\text{Ti}(\text{SH})_2$  (**1**) (0.202g, 0.827 mmol) was treated with  $\text{Me}_2\text{SnCl}_2$  (0.182, 0.827mmol) and  $\text{Et}_3\text{N}$  (0.202g, 0.831mmol) in 20 ml  $\text{CHCl}_3$ . Even after 4h of stirring there was no change in the concentration of  $\text{Me}_2\text{SnCl}_2$  in the reaction mixture.

Compound **2** was obtained by the reaction of **1** (0.244g, 1 mmol) with butyltin chloride dihydroxide (0.245, 1 mmol) in 25 ml benzene. The reaction mixture was refluxed at 80 °C for 14 hours. The precipitate (0.110 g) was filtered off and was found to be insoluble in common organic solvents. The filtrate was concentrated to give yellow-orange colored precipitate which on recrystallization gave yellow colored single crystals of **2** (and **2a**) suitable for X-ray crystallography (Yield.17%). M.P. 160°C (dec). Anal. calcd. for  $\text{C}_{54}\text{H}_{90}\text{Cl}_2\text{O}_8\text{S}_{12}\text{Sn}_6\text{Ti}_6$ : C, 27.93; H, 3.91. Found: C, 27.99; H, 3.88. IR, (KBr,  $\text{cm}^{-1}$ ), 3092, 2958, 2922, 2860 ( $\nu_{\text{CH}}$ ); 1016 ( $\delta_{\text{CH}}$ ); 620 ( $\nu_{\text{Ti-O}}$ ) ( $\nu_{\text{SH}}$  was not observed<sup>1</sup>).  $^1\text{H}$  NMR, (DMSO- $\text{D}_6$ , DMSO at 2.57 ppm) 0.94-1.72 (m, Bu); 3.02 (s, SH); 6.54 (s,Cp); 6.62(s,Cp).  $^{13}\text{C}$  NMR (DMSO at 39.50 ppm), 13.74, 25.11, 27.34, 32.61 (Bu); 133.24, 133.39 (Cp).  $^{119}\text{Sn}$  NMR, (external reference  $\text{SnMe}_4$  at 0 ppm), -122.4. Compound **3** was also obtained as yellow-orange crystals from the same mother liquor (Yield. 5%). Anal. Calcd. For  $\text{C}_{54}\text{H}_{90}\text{O}_8\text{S}_{10}\text{Cl}_6\text{Ti}_6\text{Sn}_6$  C,27.02; H,3.78, found: C, 26.97; H, 3.79.

### Spectral studies.

$^1\text{H}$ ,  $^{13}\text{C}$  and  $^{119}\text{Sn}$  NMR spectra were recorded in  $\text{CDCl}_3$  on a JEOL AL300 FT NMR spectrometer.

### X-ray Crystallography

Single-crystal X-ray data of **2** and **2a** were collected on a Xcalibur Eos (Oxford) diffractometer using graphite monochromated  $\text{MoK}\alpha$  radiation ( $\lambda = 0.71073 \text{ \AA}$ ). Data for **2** were collected at low temperature (150°C) while those for **2a** were collected at room temperature (20°C). The data integration and reduction were processed with CrysAlis Pro software.

In spite of our best efforts for more than a year good quality single crystals of **3** could not be grown. X-ray diffraction data from the available single crystals were recorded at room temperature (at IIT Kanpur, India) using a Bruker smart CCD diffractometer. The data reduction was carried out using SAINT+ software.<sup>2</sup>

All the structures were solved by the direct method and then refined on  $F^2$  by the full matrix least-squares technique with the SHELXL-97 software<sup>3</sup> using the WinGX (version 1.70.01) program package.<sup>4</sup> All non-hydrogen atoms were refined anisotropically. All hydrogen atoms were treated as riding atoms using SHELX default parameters. Since the data collections for 2a and 3 were done at room temperature. As a consequence, the thermal ellipsoids on the carbon atoms are large moreover there were several disordered atoms on the *n*-Bu groups some of which (in the case of 3) could not be resolved properly. The structure refinement could, however, be done to clarify the connectivities of atoms.

### Theoretical Calculations

All theoretical calculations were carried out using GAUSSIAN 03W set of programs.<sup>5</sup> Initial atomic coordinates were taken from the X-ray crystallographic data. Structure of the cation was then fully optimized at PBE1 level using 6-31+G\*\* (for C,H,O and Ti atoms) For the anions, optimization were carried at the same level using same basis sets for C,H, S and Cl atoms while LANL2DZ was used for the Sn atoms. Further, *n*-Bu groups have been replaced by Me groups in order to reduce calculation time. NBO analyses<sup>6</sup> were performed using the optimized atomic coordinates at the same level for the cation. LANL2DZ was used as the basis set for all the atoms while performing the calculations for the anions. Some of the NBO calculations have been repeated using B3LYP functional, however, the results obtained were similar to those obtained when PBE1 was used.

Fig. S1:

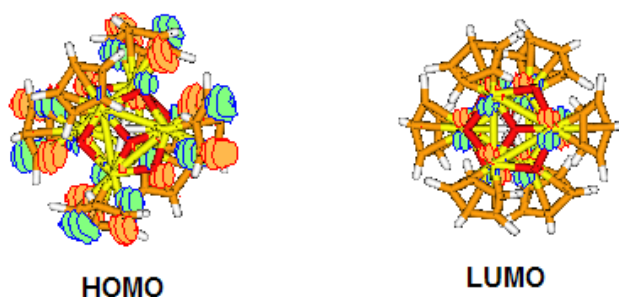

Fig. S2:

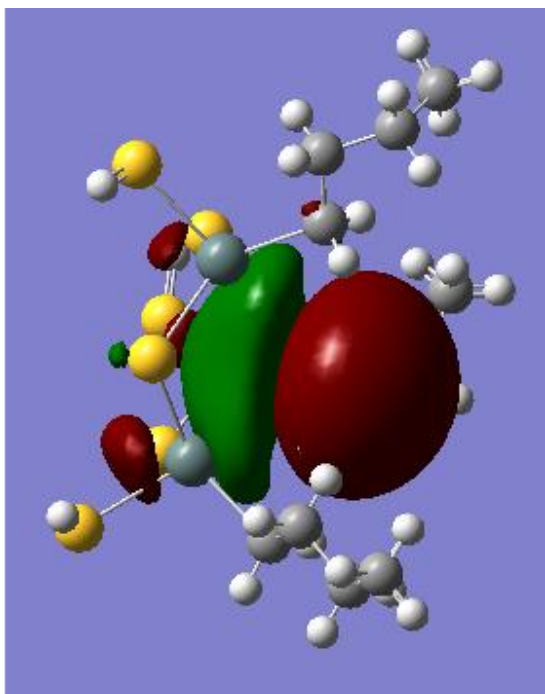

Fig. S3:

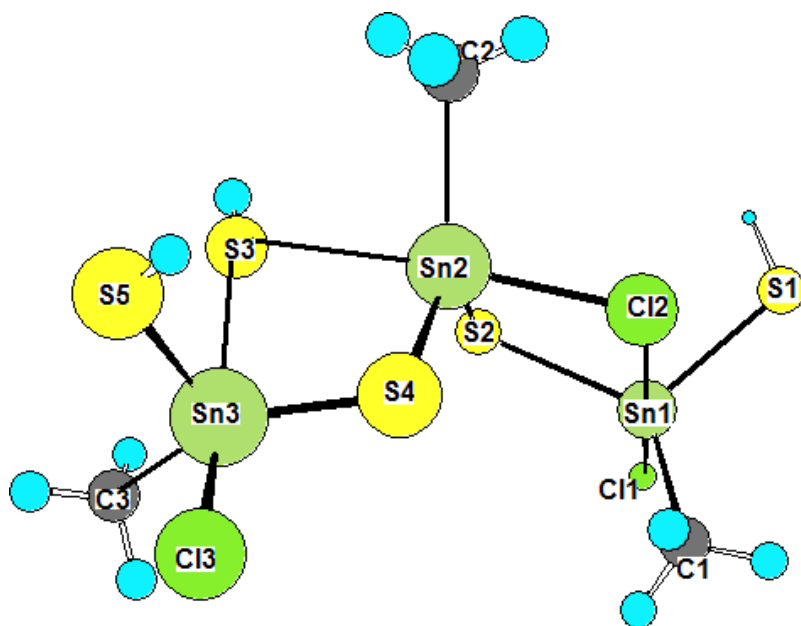

Table S1 Crystal structure and refinement data for the compounds **2**, **2a** and **3**

| Compound                                     | 2                                                                                                              | 2a                                                                                                                  | 3                                                                                                                    |
|----------------------------------------------|----------------------------------------------------------------------------------------------------------------|---------------------------------------------------------------------------------------------------------------------|----------------------------------------------------------------------------------------------------------------------|
| Molecular formula                            | C <sub>54</sub> H <sub>90</sub> Cl <sub>2</sub> O <sub>8</sub> S <sub>12</sub> Sn <sub>6</sub> Ti <sub>6</sub> | C <sub>108</sub> H <sub>180</sub> Cl <sub>4</sub> O <sub>16</sub> S <sub>24</sub> Sn <sub>12</sub> Ti <sub>12</sub> | C <sub>108</sub> H <sub>180</sub> Cl <sub>12</sub> O <sub>16</sub> S <sub>20</sub> Sn <sub>12</sub> Ti <sub>12</sub> |
| Formula weight                               | 2322.42                                                                                                        | 4644.84                                                                                                             | 4800.20                                                                                                              |
| Space group                                  | <i>Pbca</i> orthorhombic                                                                                       | <i>P2<sub>1</sub>3</i> cubic                                                                                        | <i>P2<sub>1</sub>/c</i> monoclinic                                                                                   |
| A (Å)                                        | 19.115(3)                                                                                                      | 20.2798(8)                                                                                                          | 21.687(5)                                                                                                            |
| b (Å)                                        | 19.488(3)                                                                                                      | 20.2798(8)                                                                                                          | 20.079(5)                                                                                                            |
| C (Å)                                        | 21.356(2)                                                                                                      | 20.2798(8)                                                                                                          | 22.800(5)                                                                                                            |
| V(Å <sup>3</sup> )                           | 7955.1(19)                                                                                                     | 8340.5(6)                                                                                                           | 9030(4)                                                                                                              |
| Absorption coefficient(μ)                    | 2.841                                                                                                          | 2.710                                                                                                               | 2.576                                                                                                                |
| F(000)                                       | 4544                                                                                                           | 4544                                                                                                                | 4688                                                                                                                 |
| Crystal size (mm)                            | 0.20 x 0.18 x 0.10                                                                                             | 0.18x 0.08 x 0.06                                                                                                   | 0.20 x 0.12 x 0.1                                                                                                    |
| 2θ range                                     | 2.16- 28.54                                                                                                    | 2.24- 28.45                                                                                                         | 2.06- 28.55                                                                                                          |
| Index ranges                                 | 27 ≤ h ≤ 28<br>-29 ≤ k ≤ 29<br>-31 ≤ l ≤ 32                                                                    | -15 ≤ h ≤ 14<br>-10 ≤ k ≤ 25<br>-27 ≤ l ≤ 11                                                                        | -29 ≤ h ≤ 19<br>-26 ≤ k ≤ 24<br>-29 ≤ l ≤ 30                                                                         |
| Goodness of fit                              | 1.157                                                                                                          | 1.118                                                                                                               | 0.809                                                                                                                |
| Final R indices [ <i>I</i> > 2σ( <i>I</i> )] | R <sub>1</sub> =0.0836<br>wR <sub>2</sub> =0.1605                                                              | R <sub>1</sub> =0.1063<br>wR <sub>2</sub> =0.1647                                                                   | R <sub>1</sub> =0.0654<br>wR <sub>2</sub> =0.1392                                                                    |

Table S2. Atomic coordinates of the optimized structure of  $[\text{Cp}_6\text{Ti}_6\text{O}_8]^{2+}$

| Sr. No. | Atomic No. |   | Atomic Coordinates |           |           |
|---------|------------|---|--------------------|-----------|-----------|
| 1       | 6          | 0 | 2.789530           | 2.197704  | -2.535531 |
| 2       | 6          | 0 | 2.181219           | 3.286313  | -1.858016 |
| 3       | 6          | 0 | 2.733525           | 3.353811  | -0.551755 |
| 4       | 6          | 0 | 3.684038           | 2.307441  | -0.423927 |
| 5       | 6          | 0 | 3.718659           | 1.594196  | -1.649295 |
| 6       | 22         | 0 | 1.555364           | 1.294457  | -0.714231 |
| 7       | 8          | 0 | 0.658041           | 1.796436  | 0.967919  |
| 8       | 22         | 0 | -1.236842          | 1.704338  | 0.410508  |
| 9       | 6          | 0 | -3.405137          | 2.636868  | 0.692366  |
| 10      | 6          | 0 | -2.771247          | 3.350617  | -0.357654 |
| 11      | 6          | 0 | -1.655029          | 4.034744  | 0.187380  |
| 12      | 6          | 0 | -1.597258          | 3.744724  | 1.575841  |
| 13      | 6          | 0 | -2.679505          | 2.880151  | 1.888582  |
| 14      | 22         | 0 | -0.820241          | -0.112067 | -1.978296 |
| 15      | 6          | 0 | -2.434040          | 0.594224  | -3.576399 |
| 16      | 6          | 0 | -2.559645          | -0.812363 | -3.442607 |
| 17      | 6          | 0 | -1.355400          | -1.406557 | -3.900891 |
| 18      | 6          | 0 | -0.484200          | -0.366038 | -4.318048 |
| 19      | 6          | 0 | -1.151285          | 0.871313  | -4.117351 |
| 20      | 22         | 0 | -1.545091          | -1.294865 | 0.721568  |
| 21      | 6          | 0 | -2.567445          | -3.445190 | 0.736098  |
| 22      | 6          | 0 | -2.192790          | -3.144715 | 2.071798  |
| 23      | 6          | 0 | -2.950735          | -2.021214 | 2.497078  |
| 24      | 6          | 0 | -3.792165          | -1.628186 | 1.424144  |
| 25      | 6          | 0 | -3.555387          | -2.508184 | 0.336839  |
| 26      | 22         | 0 | 1.234269           | -1.707725 | -0.416343 |
| 27      | 6          | 0 | 1.605496           | -3.731912 | -1.605363 |
| 28      | 6          | 0 | 1.632175           | -4.044352 | -0.220897 |
| 29      | 6          | 0 | 2.740631           | -3.376298 | 0.358767  |
| 30      | 6          | 0 | 3.401618           | -2.650797 | -0.666706 |
| 31      | 6          | 0 | 2.700296           | -2.870755 | -1.881362 |
| 32      | 22         | 0 | 0.827667           | 0.120254  | 1.978668  |
| 33      | 6          | 0 | 2.336014           | 1.135814  | 3.511991  |
| 34      | 6          | 0 | 1.029328           | 1.284579  | 4.043738  |
| 35      | 6          | 0 | 0.523395           | -0.009349 | 4.332817  |
| 36      | 6          | 0 | 1.518197           | -0.958593 | 3.980037  |
| 37      | 6          | 0 | 2.638958           | -0.250250 | 3.472674  |
| 38      | 8          | 0 | 0.298978           | -1.659975 | 1.314153  |
| 39      | 8          | 0 | -1.124650          | 0.301889  | 1.793357  |
| 40      | 8          | 0 | -2.082597          | 0.169508  | -0.483633 |
| 41      | 8          | 0 | -0.654361          | -1.794582 | -0.964774 |
| 42      | 8          | 0 | -0.290822          | 1.662240  | -1.313757 |
| 43      | 8          | 0 | 1.130243           | -0.301469 | -1.792830 |
| 44      | 8          | 0 | 2.086169           | -0.167814 | 0.484625  |
| 45      | 1          | 0 | 4.270326           | 2.081572  | 0.456682  |
| 46      | 1          | 0 | 1.416543           | 3.937120  | -2.259698 |
| 47      | 1          | 0 | 3.022432           | -3.403736 | 1.402833  |
| 48      | 1          | 0 | -3.077427          | 3.362282  | -1.395081 |
| 49      | 1          | 0 | 1.431122           | -2.032924 | 4.069321  |
| 50      | 1          | 0 | -1.448160          | -3.666293 | 2.657517  |
| 51      | 1          | 0 | 0.873123           | -4.081202 | -2.320421 |

|    |   |   |           |           |           |
|----|---|---|-----------|-----------|-----------|
| 52 | 1 | 0 | -3.418843 | -1.337552 | -3.047999 |
| 53 | 1 | 0 | 0.921104  | -4.667566 | 0.304917  |
| 54 | 1 | 0 | -2.161417 | -4.236834 | 0.120794  |
| 55 | 1 | 0 | -4.486261 | -0.798517 | 1.428701  |
| 56 | 1 | 0 | -3.182257 | 1.325729  | -3.302397 |
| 57 | 1 | 0 | -4.277242 | 2.005068  | 0.592042  |
| 58 | 1 | 0 | -0.850638 | 4.109089  | 2.268347  |
| 59 | 1 | 0 | 2.981077  | 1.938316  | 3.180157  |
| 60 | 1 | 0 | -4.036173 | -2.464395 | -0.631069 |
| 61 | 1 | 0 | 4.276172  | -2.027382 | -0.538345 |
| 62 | 1 | 0 | -2.887747 | -1.541029 | 3.464057  |
| 63 | 1 | 0 | 2.945680  | -2.441675 | -2.843351 |
| 64 | 1 | 0 | -0.455043 | -0.231106 | 4.736927  |
| 65 | 1 | 0 | 2.464893  | 4.067864  | 0.214938  |
| 66 | 1 | 0 | -0.749885 | 1.854014  | -4.325322 |
| 67 | 1 | 0 | -2.902632 | 2.464596  | 2.861873  |
| 68 | 1 | 0 | 4.336333  | 0.732706  | -1.865704 |
| 69 | 1 | 0 | -1.135648 | -2.465488 | -3.913340 |
| 70 | 1 | 0 | 0.504968  | 2.219607  | 4.188349  |
| 71 | 1 | 0 | 0.517407  | -0.492937 | -4.705748 |
| 72 | 1 | 0 | -0.961649 | 4.658172  | -0.361097 |
| 73 | 1 | 0 | 3.557499  | -0.687112 | 3.104704  |
| 74 | 1 | 0 | 2.572240  | 1.873339  | -3.544333 |
| 75 | 0 | 0 | 0.006720  | 0.005084  | 0.000778  |

Table S3. Results of the second order perturbation theory analysis (in NBO) of the anion of **2** revealing Sn-Cl interactions.

| E(2)<br>kcal/mol | E(j) - E(i)<br>Donor NBO (i)<br>a.u. | F(i, j)<br>a.u. | Acceptor NBO (j)            |
|------------------|--------------------------------------|-----------------|-----------------------------|
| 64.              | LP ( 1) Cl 34                        |                 | /239. BD* ( 1) Sn 41 - S 47 |
| 2.64             | 0.62                                 | 0.037           |                             |
| 64.              | LP ( 1) Cl 34                        |                 | /242. BD* ( 1) Sn 42 - S 49 |
| 3.98             | 0.62                                 | 0.046           |                             |
| 64.              | LP ( 1) Cl 34                        |                 | /245. BD* ( 1) Sn 43 - S 51 |
| 2.66             | 0.62                                 | 0.037           |                             |
| 65.              | LP ( 2) Cl 34                        |                 | /228. BD* ( 1) C 29 -Sn 41  |
| 2.86             | 0.40                                 | 0.031           |                             |
| 65.              | LP ( 2) Cl 34                        |                 | /234. BD* ( 1) C 37 -Sn 43  |
| 2.47             | 0.44                                 | 0.030           |                             |
| 65.              | LP ( 2) Cl 34                        |                 | /237. BD* ( 1) Sn 41 - S 44 |
| 1.91             | 0.36                                 | 0.024           |                             |
| 65.              | LP ( 2) Cl 34                        |                 | /239. BD* ( 1) Sn 41 - S 47 |
| 5.05             | 0.39                                 | 0.040           |                             |
| 65.              | LP ( 2) Cl 34                        |                 | /240. BD* ( 1) Sn 42 - S 44 |
| 1.20             | 0.37                                 | 0.019           |                             |
| 65.              | LP ( 2) Cl 34                        |                 | /241. BD* ( 1) Sn 42 - S 46 |
| 1.43             | 0.36                                 | 0.021           |                             |
| 65.              | LP ( 2) Cl 34                        |                 | /244. BD* ( 1) Sn 43 - S 46 |
| 2.52             | 0.36                                 | 0.027           |                             |
| 65.              | LP ( 2) Cl 34                        |                 | /245. BD* ( 1) Sn 43 - S 51 |
| 4.55             | 0.39                                 | 0.038           |                             |
| 66.              | LP ( 3) Cl 34                        |                 | /228. BD* ( 1) C 29 -Sn 41  |
| 1.59             | 0.41                                 | 0.023           |                             |
| 66.              | LP ( 3) Cl 34                        |                 | /232. BD* ( 1) C 32 -Sn 42  |
| 3.43             | 0.44                                 | 0.035           |                             |
| 66.              | LP ( 3) Cl 34                        |                 | /234. BD* ( 1) C 37 -Sn 43  |
| 1.94             | 0.45                                 | 0.027           |                             |
| 66.              | LP ( 3) Cl 34                        |                 | /238. BD* ( 1) Sn 41 - S 45 |
| 3.42             | 0.38                                 | 0.033           |                             |
| 66.              | LP ( 3) Cl 34                        |                 | /239. BD* ( 1) Sn 41 - S 47 |
| 4.16             | 0.40                                 | 0.036           |                             |
| 66.              | LP ( 3) Cl 34                        |                 | /242. BD* ( 1) Sn 42 - S 49 |
| 2.61             | 0.40                                 | 0.029           |                             |
| 66.              | LP ( 3) Cl 34                        |                 | /243. BD* ( 1) Sn 43 - S 45 |
| 3.30             | 0.38                                 | 0.032           |                             |
| 66.              | LP ( 3) Cl 34                        |                 | /245. BD* ( 1) Sn 43 - S 51 |
| 5.50             | 0.40                                 | 0.042           |                             |
| 67.              | LP ( 4) Cl 34                        |                 | /161. RY* ( 3) Sn 41        |
| 1.04             | 0.99                                 | 0.030           |                             |
| 67.              | LP ( 4) Cl 34                        |                 | /165. RY* ( 3) Sn 42        |
| 1.65             | 0.96                                 | 0.037           |                             |
| 67.              | LP ( 4) Cl 34                        |                 | /169. RY* ( 3) Sn 43        |
| 1.03             | 1.04                                 | 0.031           |                             |

|                  |                           |
|------------------|---------------------------|
| 67. LP ( 4)Cl 34 | /228. BD*( 1) C 29 -Sn 41 |
| 1.47 0.59 0.026  |                           |
| 67. LP ( 4)Cl 34 | /232. BD*( 1) C 32 -Sn 42 |
| 4.16 0.62 0.046  |                           |
| 67. LP ( 4)Cl 34 | /234. BD*( 1) C 37 -Sn 43 |
| 1.27 0.63 0.025  |                           |
| 67. LP ( 4)Cl 34 | /228. BD*( 1) C 29 -Sn 41 |
| 1.47 0.59 0.026  |                           |
| 67. LP ( 4)Cl 34 | /232. BD*( 1) C 32 -Sn 42 |
| 4.16 0.62 0.046  |                           |
| 67. LP ( 4)Cl 34 | /234. BD*( 1) C 37 -Sn 43 |
| 1.27 0.63 0.025  |                           |
| 67. LP ( 4)Cl 34 | /237. BD*( 1)Sn 41 - S 44 |
| 3.49 0.55 0.040  |                           |
| 67. LP ( 4)Cl 34 | /238. BD*( 1)Sn 41 - S 45 |
| 3.20 0.56 0.038  |                           |
| 67. LP ( 4)Cl 34 | /239. BD*( 1)Sn 41 - S 47 |
| 10.75 0.58 0.072 |                           |
| 67. LP ( 4)Cl 34 | /240. BD*( 1)Sn 42 - S 44 |
| 5.27 0.56 0.049  |                           |
| 67. LP ( 4)Cl 34 | /241. BD*( 1)Sn 42 - S 46 |
| 7.77 0.55 0.059  |                           |
| 67. LP ( 4)Cl 34 | /242. BD*( 1)Sn 42 - S 49 |
| 20.73 0.58 0.099 |                           |
| 67. LP ( 4)Cl 34 | /243. BD*( 1)Sn 43 - S 45 |
| 2.58 0.56 0.034  |                           |
| 67. LP ( 4)Cl 34 | /244. BD*( 1)Sn 43 - S 46 |
| 4.42 0.55 0.044  |                           |
| 67. LP ( 4)Cl 34 | /245. BD*( 1)Sn 43 - S 51 |
| 10.59 0.58 0.071 |                           |



Table S4. Atomic coordinates of the optimized structure of  $[\text{Me}_3\text{Sn}_3\text{Cl}_3(\text{S})_2(\text{SH})_3]^-$

| Sr. No | Atomic No. |   | Atomic coordinates |           |           |
|--------|------------|---|--------------------|-----------|-----------|
| 1      | 6          | 0 | -2.984807          | -1.984848 | -1.693658 |
| 2      | 50         | 0 | -3.193174          | -0.644350 | -0.099078 |
| 3      | 16         | 0 | -1.478412          | 0.019605  | 1.366054  |
| 4      | 50         | 0 | -0.018282          | 1.273415  | -0.018489 |
| 5      | 16         | 0 | 1.864401           | 1.024296  | 2.069425  |
| 6      | 17         | 0 | -4.354192          | -1.991335 | 1.502058  |
| 7      | 16         | 0 | -4.866051          | 0.925783  | -0.342482 |
| 8      | 16         | 0 | 1.425415           | 0.000125  | -1.405243 |
| 9      | 50         | 0 | 3.148921           | -0.644165 | 0.042112  |
| 10     | 17         | 0 | 4.279824           | -1.971356 | -1.597980 |
| 11     | 6          | 0 | 0.179893           | 3.761780  | 0.232200  |
| 12     | 17         | 0 | -1.732888          | 1.177113  | -1.917352 |
| 13     | 16         | 0 | 4.789466           | 0.987619  | 0.208099  |
| 14     | 6          | 0 | 3.298382           | -2.197725 | 2.006340  |
| 15     | 1          | 0 | 4.714338           | 1.727421  | -0.735287 |
| 16     | 1          | 0 | -4.892511          | 1.636324  | 0.623681  |
| 17     | 1          | 0 | 0.897441           | 4.143627  | -0.492534 |
| 18     | 1          | 0 | -0.791438          | 4.222593  | 0.058744  |
| 19     | 1          | 0 | 0.519700           | 3.999248  | 1.239206  |
| 20     | 1          | 0 | 4.316385           | -2.196979 | 2.393108  |
| 21     | 1          | 0 | 2.613896           | -1.864982 | 2.785238  |
| 22     | 1          | 0 | 3.029741           | -3.205570 | 1.693289  |
| 23     | 1          | 0 | -3.943519          | -2.102539 | -2.196590 |
| 24     | 1          | 0 | -2.250008          | -1.598914 | -2.398673 |
| 25     | 1          | 0 | -2.652508          | -2.950371 | -1.315153 |
| 26     | 1          | 0 | 1.570627           | 1.505891  | 2.740460  |

## References:

- <sup>1</sup> A  $\nu_{\text{S-H}}$  peak is usually observed between 2500 and 2600  $\text{cm}^{-1}$  both in organic thiols and metal hydrosulfides. These peaks are always of low intensity and may go undetected in some cases (For example, please see G. R. Clark, K. R. Flower, W. R. Roper, L. J. Wright, *Organometallics*. 1993, 12, 3810-3811)
- <sup>2</sup> SAINT+, 6.02 ed., Bruker AXS, Madison, WI, 1999
- <sup>3</sup> G.M. Sheldrick, SHELX 97, Program for Crystal Structure Refinement from Diffraction Data, University of Göttingen, 1997.
- <sup>4</sup> L.J. Farrugia, *J. Appl. Cryst.* 1999, **32**, 837.
- <sup>5</sup> J.R. Cheeseman, J. A. Montgomery, Jr., T. Vreven, K. N. Kudin, J. C. Burant, J.M. Millam, S. S. Iyengar, J. Tomasi, V. Barone, B. Mennucci, M. Cossi, G. Scalmani, N. Rega, G. A. Petersson, H. Nakatsuji, M. Hada, M. Ehara, K. Toyota, R. Fukuda, J. Hasegawa, M. Ishida, T. Nakajima, Y. Honda, O. Kitao, H. Nakai, M. Klene, X. Li, J. E. Knox, H. P. Hratchian, J. B. Cross, V. Bakken, C. Adamo, J. Jaramillo, R. Gomperts, R. E. Stratmann, O. Yazyev, A. J. Austin, R. Cammi, C. Pomelli, J. W. Ochterski, P. Y. Ayala, K. Morokuma, G. A. Voth, P. Salvador, J. J. Dannenberg, V. G. Zakrzewski, S. Dapprich, A. D. Daniels, M. C. Strain, O. Farkas, D. K. Malick, A. D. Rabuck, K. Raghavachari,

---

Foresman, J. V. Ortiz, Q. Cui, A. G. Baboul, S. Clifford, J. Cioslowski, B. B. Stefanov, J. B. G. Liu, A. Liashenko, P. Piskorz, I. Komaromi, R. L. Martin, D. J. Fox, T. Keith, M. A. Al-Laham, C. Y. Peng, A. Nanayakkara, M. Challacombe, P. M.W. Gill, B. Johnson, W. Chen, M.W. Wong, C. Gonzalez and J. A. Pople, Gaussian 03, Revision D.01, Gaussian, Inc., Wallingford CT, 2004

<sup>6</sup> D. C. Young, Computational chemistry. A practical guide for applying techniques, John Wiley, 2001, pp.100-101.
